# Supplementary material for: Phenomic and transcriptomic analyses reveal that autophagy plays a major role in desiccation tolerance in Saccharomyces cerevisiae
Source: Royal Society of Chemistry journal article supplement (doi:10.1039/c0mb00114g), 2010-10-20
Supplement: supplementarytable1.pdf [file supplementarytable1.pdf]

**Supplementary Table 1.** Desiccation tolerance of mutant strains carrying deletions in genes identified as beneficial by phenomics<sup>1</sup>.

| Mutant                                                                           | Affected protein function/annotation          | Phenomics, fold under-representation | Survival (%) | SD (%) |
|----------------------------------------------------------------------------------|-----------------------------------------------|--------------------------------------|--------------|--------|
| <b>Intolerant deletion mutants (&lt;10% survival of desiccation)</b>             |                                               |                                      |              |        |
| <i>cox16Δ</i>                                                                    | assembly of cytochrome c oxidase              | -510                                 | 8            | 1      |
| <i>rim15Δ</i>                                                                    | glucose-repressible protein kinase            | -264                                 | 6            | 1      |
| <i>tdh1Δ</i>                                                                     | glyceraldehyde-3-phosphate dehydrogenase      | -3                                   | 2            | 1      |
| <b>Deletion mutants severely affected (10-34% survival of desiccation)</b>       |                                               |                                      |              |        |
| <i>bck1Δ</i>                                                                     | MAPKKK of the cell integrity pathway          | -52                                  | 17           | 1      |
| <i>blm10Δ</i>                                                                    | nuclear assembly and regulation of proteasome | -11                                  | 16           | 1      |
| <i>cat8Δ</i>                                                                     | transcription factor                          | -8                                   | 24           | 1      |
| <i>hap2Δ</i>                                                                     | transcription factor                          | -111                                 | 13           | 1      |
| <i>kre1Δ</i>                                                                     | cell wall glycoprotein                        | -11                                  | 34           | 8      |
| <i>ksp1Δ</i>                                                                     | putative serine/threonine protein kinase      | -39                                  | 26           | 1      |
| <i>mir1Δ</i>                                                                     | mitochondrial phosphate carrier               | -18                                  | 14           | 1      |
| <i>opi3Δ</i>                                                                     | phospholipid methyltransferase                | -19                                  | 29           | 2      |
| <i>ptk2Δ</i>                                                                     | putative serine/threonine protein kinase      | -143                                 | 13           | 1      |
| <i>ras2Δ</i>                                                                     | regulates nitrogen starvation response etc.   | -40                                  | 10           | 1      |
| <i>rhr2Δ</i>                                                                     | DL-glycerol-3-phosphatase                     | -46                                  | 22           | 1      |
| <i>sel1Δ</i>                                                                     | ER-associated protein degradation             | -23                                  | 34           | 1      |
| <i>sin3Δ</i>                                                                     | DNA binding subunit of histone deacetylase    | -5                                   | 27           | 3      |
| <b>Deletion mutants moderately affected (35-60% survival of desiccation)</b>     |                                               |                                      |              |        |
| <i>fbp26Δ</i>                                                                    | fructose-2,6-bisphosphatase                   | -166                                 | 38           | 1      |
| <i>msn2Δ</i>                                                                     | transcription factor                          | -3                                   | 40           | 1      |
| <i>sak1Δ</i>                                                                     | upstream kinase for the Snf1 complex          | -34                                  | 46           | 6      |
| <i>tcb1Δ</i>                                                                     | calcium/lipid binding protein                 | -4                                   | 36           | 3      |
| <i>ubi4Δ</i>                                                                     | ubiquitin, essential for stress response      | -87                                  | 49           | 3      |
| <i>yak1Δ</i>                                                                     | serine-threonine protein kinase               | -166                                 | 35           | 3      |
| <b>Deletion mutants not adversely affected (&gt;60% survival of desiccation)</b> |                                               |                                      |              |        |
| <i>fps1Δ</i>                                                                     | glycerol efflux                               | -25                                  | 65           | 2      |
| <i>hog1Δ</i>                                                                     | MAP kinase                                    | -24                                  | 63           | 3      |
| <i>msn1Δ</i>                                                                     | transcription factor                          | -7                                   | 62           | 1      |
| <i>pbs2Δ</i>                                                                     | MAP kinase kinase                             | -28                                  | 66           | 1      |
| <i>slt2Δ</i>                                                                     | MAP kinase; CWI, cell cycle progression       | -32                                  | 78           | 1      |
| <i>ssk1Δ</i>                                                                     | signal transduction; MAPKKK for Hog1          | -4                                   | 61           | 1      |
| <i>tdh3Δ</i>                                                                     | glyceraldehyde-3-phosphate dehydrogenase      | -3                                   | 68           | 2      |

1: Strains derived from BY4741 were grown individually to the post-diauxic phase of growth in YEPD media before drying. The proportion of cells surviving desiccation was measured as

detailed in the Methods, and the mean and standard deviation (SD) of three replicate experiments is shown. Survival of the parental strain BY4741 was 70%  $\pm$  6%.
