# Supplementary material for: Phenomic and transcriptomic analyses reveal that autophagy plays a major role in desiccation tolerance in Saccharomyces cerevisiae
Source: Royal Society of Chemistry journal article supplement (doi:10.1039/c0mb00114g), 2010-10-20
Supplement: supplementarytable2.pdf [file supplementarytable2.pdf]

**Supplementary Table 2.** Desiccation tolerance of mutant strains carrying deletions in genes identified as beneficial by phenomics (a), significantly differently expressed in the transcriptomics study (b (up) or (down) regulated), or selected based on biological function (c)<sup>1</sup>.

| Selection criteria                                                           | Mutant        | Affected protein function/annotation                 | Phenomics, fold under-representation <sup>2</sup> | Survival (%) | SD (%) |
|------------------------------------------------------------------------------|---------------|------------------------------------------------------|---------------------------------------------------|--------------|--------|
| <b>Intolerant deletion mutants (&lt;10% survival of desiccation)</b>         |               |                                                      |                                                   |              |        |
| a                                                                            | <i>cox16Δ</i> | assembly of cytochrome c oxidase                     | -510                                              | 8            | 1      |
| b (up)                                                                       | <i>dcs1Δ</i>  | hydrolase                                            | NI                                                | 3            | 1      |
| a, b (up)                                                                    | <i>rim15Δ</i> | glucose-repressible protein kinase                   | -264                                              | 6            | 1      |
| c                                                                            | <i>snf1Δ</i>  | serine/threonine protein kinase                      | NI                                                | 4            | 1      |
| c                                                                            | <i>snf4Δ</i>  | protein kinase activator of Snf1p complex            | NI                                                | 6            | 1      |
| a                                                                            | <i>tdh1Δ</i>  | glyceraldehyde-3-phosphate dehydrogenase             | -3                                                | 2            | 1      |
| <b>Deletion mutants severely affected (10-34% survival of desiccation)</b>   |               |                                                      |                                                   |              |        |
| a                                                                            | <i>bck1Δ</i>  | MAPKKK of the cell integrity pathway                 | -52                                               | 17           | 1      |
| b (up)                                                                       | <i>bcy1Δ</i>  | regulatory subunit of PKA                            | NI                                                | 27           | 3      |
| a, b (up)                                                                    | <i>blm10Δ</i> | nuclear assembly and regulation of proteasome        | -11                                               | 16           | 1      |
| a                                                                            | <i>cat8Δ</i>  | transcription factor                                 | -8                                                | 24           | 1      |
| a                                                                            | <i>hap2Δ</i>  | transcription factor                                 | -111                                              | 13           | 1      |
| a                                                                            | <i>kre1Δ</i>  | cell wall glycoprotein                               | -11                                               | 34           | 8      |
| a                                                                            | <i>ksp1Δ</i>  | putative serine/threonine protein kinase             | -39                                               | 26           | 1      |
| c                                                                            | <i>mig1Δ</i>  | transcription factor; glucose repression             | NI                                                | 27           | 1      |
| a                                                                            | <i>mir1Δ</i>  | mitochondrial phosphate carrier                      | -18                                               | 14           | 1      |
| a                                                                            | <i>opi3Δ</i>  | phospholipid methyltransferase                       | -19                                               | 29           | 2      |
| a                                                                            | <i>ptk2Δ</i>  | putative serine/threonine protein kinase             | -143                                              | 13           | 1      |
| a                                                                            | <i>ras2Δ</i>  | regulates nitrogen starvation response etc.          | -40                                               | 10           | 1      |
| a                                                                            | <i>rhr2Δ</i>  | DL-glycerol-3-phosphatase                            | -46                                               | 22           | 1      |
| a                                                                            | <i>sel1Δ</i>  | ER-associated protein degradation                    | -23                                               | 34           | 1      |
| a                                                                            | <i>sin3Δ</i>  | DNA binding subunit of histone deacetylase           | -5                                                | 27           | 3      |
| c                                                                            | <i>sir2Δ</i>  | histone deacetylase                                  | NI                                                | 24           | 1      |
| <b>Deletion mutants moderately affected (35-60% survival of desiccation)</b> |               |                                                      |                                                   |              |        |
| a                                                                            | <i>fbp26Δ</i> | fructose-2,6-bisphosphatase                          | -166                                              | 38           | 1      |
| c                                                                            | <i>gts1Δ</i>  | zinc-finger protein; regulates cell cycle, cell size | NI                                                | 36           | 1      |
| c                                                                            | <i>hnm1Δ</i>  | choline permease                                     | NI                                                | 41           | 1      |
| c                                                                            | <i>hvk2Δ</i>  | hexokinase PII                                       | NI                                                | 57           | 2      |
| b (up)                                                                       | <i>ino1Δ</i>  | inositol-1-phosphate synthase                        | NI                                                | 35           | 2      |
| c                                                                            | <i>kss1Δ</i>  | MAP kinase; filamentous growth                       | NI                                                | 59           | 2      |

|                                                                                  |                |                                           |      |    |   |
|----------------------------------------------------------------------------------|----------------|-------------------------------------------|------|----|---|
| <i>a, b (up)</i>                                                                 | <i>msn2Δ</i>   | transcription factor                      | -3   | 40 | 1 |
| <i>a, b (down)</i>                                                               | <i>msn4Δ</i>   | transcription factor                      | -3.9 | 58 | 2 |
| <i>c</i>                                                                         | <i>rad1Δ</i>   | single-stranded DNA endonuclease          | NI   | 59 | 4 |
| <i>a</i>                                                                         | <i>sak1Δ</i>   | upstream kinase for the Snf1 complex      | -34  | 46 | 6 |
| <i>c</i>                                                                         | <i>sip1Δ</i>   | beta-subunit of the Snf1 complex          | NI   | 37 | 1 |
| <i>c</i>                                                                         | <i>sip4Δ</i>   | transcription factor; regulated by Snf1   | NI   | 49 | 2 |
| <i>c</i>                                                                         | <i>sod1Δ</i>   | Cu, Zn superoxide dismutase               | NI   | 56 | 2 |
| <i>c</i>                                                                         | <i>sod2Δ</i>   | Mn-containing superoxide dismutase        | NI   | 48 | 1 |
| <i>a, b (up)</i>                                                                 | <i>tcb1Δ</i>   | calcium/lipid binding protein             | -4   | 36 | 3 |
| <i>c</i>                                                                         | <i>tsl1Δ</i>   | trehalose biosynthesis                    | NI   | 35 | 3 |
| <i>c</i>                                                                         | <i>tpk1Δ</i>   | subunit of cytoplasmic PKA                | NI   | 39 | 2 |
| <i>a</i>                                                                         | <i>ubi4Δ</i>   | ubiquitin, essential for stress response  | -87  | 49 | 3 |
| <i>a, b (up)</i>                                                                 | <i>yak1Δ</i>   | serine-threonine protein kinase           | -166 | 35 | 3 |
| <i>b (up)</i>                                                                    | <i>yap1Δ</i>   | transcription factor, oxidative stress    | NI   | 57 | 3 |
| <b>Deletion mutants not adversely affected (&gt;60% survival of desiccation)</b> |                |                                           |      |    |   |
| <i>b (up)</i>                                                                    | <i>agp1Δ</i>   | amino acid uptake                         | NI   | 75 | 1 |
| <i>b (up)</i>                                                                    | <i>ald3Δ</i>   | aldehyde dehydrogenase; stress induced    | NI   | 65 | 1 |
| <i>b (up)</i>                                                                    | <i>avt1Δ</i>   | amino acid vacuolar transporter           | NI   | 70 | 1 |
| <i>c</i>                                                                         | <i>bmh1Δ</i>   | 14-3-3 protein                            | NI   | 86 | 1 |
| <i>c</i>                                                                         | <i>bmh2Δ</i>   | 14-3-3 protein                            | NI   | 64 | 1 |
| <i>c</i>                                                                         | <i>cnb1Δ</i>   | calcineurin B; regulates Crz1             | NI   | 74 | 3 |
| <i>b (up)</i>                                                                    | <i>ctt1Δ</i>   | cytosolic catalase                        | NI   | 67 | 3 |
| <i>c</i>                                                                         | <i>crz1Δ</i>   | transcription factor, stress response     | NI   | 71 | 4 |
| <i>b (up)</i>                                                                    | <i>ecm29Δ</i>  | major component of the proteasome         | NI   | 74 | 1 |
| <i>c</i>                                                                         | <i>elm1Δ</i>   | serine/threonine protein kinase           | NI   | 65 | 1 |
| <i>a</i>                                                                         | <i>fps1Δ</i>   | glycerol efflux                           | -25  | 65 | 2 |
| <i>b (down)</i>                                                                  | <i>fus3Δ</i>   | MAP kinase, mating                        | NI   | 67 | 1 |
| <i>c</i>                                                                         | <i>gal83Δ</i>  | beta-subunit of the Snf1 kinase complex   | NI   | 61 | 3 |
| <i>b (up)</i>                                                                    | <i>gap1Δ</i>   | amino acid permease                       | NI   | 62 | 2 |
| <i>b (up)</i>                                                                    | <i>glo1Δ</i>   | monomeric glyoxalase I                    | NI   | 69 | 6 |
| <i>b (up)</i>                                                                    | <i>gpd1Δ</i>   | glycerol biosynthesis                     | NI   | 66 | 3 |
| <i>c</i>                                                                         | <i>gpd2Δ</i>   | glycerol biosynthesis                     | NI   | 73 | 1 |
| <i>c</i>                                                                         | <i>gre1Δ</i>   | hydrophilin of unknown function           | NI   | 61 | 5 |
| <i>b (up)</i>                                                                    | <i>gre2Δ</i>   | methylglyoxal reductase                   | NI   | 72 | 1 |
| <i>b (up)</i>                                                                    | <i>gre3Δ</i>   | aldose reductase                          | NI   | 70 | 1 |
| <i>a</i>                                                                         | <i>hog1Δ</i>   | MAP kinase                                | -24  | 63 | 3 |
| <i>c</i>                                                                         | <i>hom2Δ</i>   | aspartic beta semi-aldehyde dehydrogenase | NI   | 69 | 2 |
| <i>c</i>                                                                         | <i>hor2Δ</i>   | DL-glycerol-3-phosphatase                 | NI   | 67 | 4 |
| <i>c</i>                                                                         | <i>hot1Δ</i>   | transcription factor                      | NI   | 65 | 2 |
| <i>c</i>                                                                         | <i>hsp104Δ</i> | heat shock protein; disaggregase          | NI   | 73 | 8 |
| <i>c</i>                                                                         | <i>hsp12Δ</i>  | stress response protein                   | NI   | 72 | 3 |
| <i>b (down)</i>                                                                  | <i>inm1Δ</i>   | inositol biosynthesis                     | NI   | 71 | 3 |

|           |                     |                                                  |      |    |   |
|-----------|---------------------|--------------------------------------------------|------|----|---|
| c         | <i>mbp1Δ</i>        | transcription factor; G1 to S regulation         | NI   | 79 | 1 |
| c         | <i>msb2Δ</i>        | osmosensor                                       | NI   | 64 | 2 |
| a         | <i>msn1Δ</i>        | transcription factor                             | -7   | 62 | 1 |
| b (down)  | <i>nop6Δ</i>        | hydrophilin of unknown function                  | NI   | 80 | 2 |
| c         | <i>nth1Δ</i>        | neutral trehalase                                | NI   | 69 | 3 |
| a         | <i>pbs2Δ</i>        | MAP kinase kinase                                | -28  | 66 | 1 |
| b (up)    | <i>pma2Δ</i>        | plasma membrane H <sup>+</sup> /ATPase           | NI   | 62 | 4 |
| b (up)    | <i>pns1Δ</i>        | putative choline transporter                     | NI   | 66 | 5 |
| c         | <i>reg1Δ</i>        | regulatory subunit of protein phosphatase 1      | NI   | 95 | 7 |
| b (up), c | <i>reg2Δ</i>        | regulatory subunit of protein phosphatase 1      | NI   | 81 | 1 |
| c         | <i>rlm1Δ</i>        | transcription factor                             | NI   | 62 | 3 |
| c         | <i>rpd3Δ</i>        | histone deacetylase                              | NI   | 62 | 3 |
| b (up)    | <i>sfa1Δ</i>        | formaldehyde detoxification                      | NI   | 75 | 1 |
| c         | <i>sho1Δ</i>        | osmosensor                                       | NI   | 62 | 2 |
| c         | <i>sip18Δ</i>       | unknown function; induced by osmostress          | NI   | 70 | 2 |
| c         | <i>sip2Δ</i>        | beta subunit of the Snf1 complex; ageing-related | NI   | 64 | 5 |
| a         | <i>skn7Δ</i>        | transcription factor; stress response            | -7.8 | 71 | 3 |
| c         | <i>sko1Δ</i>        | transcription factor; stress response            | NI   | 66 | 2 |
| a         | <i>slt2Δ</i>        | MAP kinase; CWI, cell cycle progression          | -32  | 78 | 1 |
| c         | <i>smk1Δ</i>        | MAP kinase, sporulation                          | NI   | 73 | 6 |
| c         | <i>smp1Δ</i>        | putative transcription factor, osmostress        | NI   | 67 | 3 |
| a         | <i>ssk1Δ</i>        | signal transduction; MAPKKK for Hog1             | -4   | 61 | 1 |
| c         | <i>stb5Δ</i>        | transcription factor; binds Sin3                 | NI   | 69 | 8 |
| c         | <i>ste11Δ</i>       | MAPKK kinase; osmostress, pheromone resp.        | NI   | 66 | 6 |
| c         | <i>stf2Δ</i>        | regulation of mitochondrial F1F0-ATP synthase    | NI   | 69 | 1 |
| b (up)    | <i>stl1Δ</i>        | glycerol/H <sup>+</sup> symporter                | NI   | 64 | 6 |
| c         | <i>swi4Δ</i>        | transcription factor                             | NI   | 64 | 3 |
| c         | <i>tdh2Δ</i>        | glyceraldehyde-3-phosphate dehydrogenase         | NI   | 68 | 4 |
| a         | <i>tdh3Δ</i>        | glyceraldehyde-3-phosphate dehydrogenase         | -3   | 68 | 2 |
| c         | <i>tos3Δ</i>        | protein kinase activator of Snf1 complex         | NI   | 60 | 1 |
| b (up), c | <i>tpk2Δ</i>        | subunit of cytoplasmic PKA                       | NI   | 60 | 1 |
| c         | <i>tpk3Δ</i>        | subunit of cytoplasmic PKA                       | NI   | 72 | 2 |
| b (up)    | <i>ynl195cΔ</i>     | hypothetical protein, mitochondrial              | NI   | 69 | 1 |
| b (up)    | <i>ypr115w</i><br>Δ | hypothetical protein, cytoplasm                  | NI   | 72 | 2 |
| c         | <i>zap1Δ</i>        | transcription factor                             | NI   | 79 | 1 |

1: Strains derived from BY4741 were grown individually to the post-diauxic phase of growth in YEPD media before drying. The proportion of cells surviving desiccation was measured as detailed in the Methods, and the mean and standard deviation (SD) of three replicate experiments is shown. Survival of the parental strain BY4741 was 70% +/-6%. Includes the data from Supplementary table 1.

2: NI = not identified as under-represented
